# Supplementary material for: Signal transducer and activator of transcription STAT5 is recruited to c-Myc super-enhancer
Source: PubMed Central journal article supplement (PMC4831086; doi:10.1186/s12867-016-0063-y), 2016-04-14
Supplement: 12867_2016_63_MOESM1_ESM.pdf [file 12867_2016_63_MOESM1_ESM.pdf]

**Formaldehyde-crosslinked  
STAT5A-1\*6-expressing cells**

**Non-crosslinked  
STAT5A-1\*6-expressing cells**

**A**

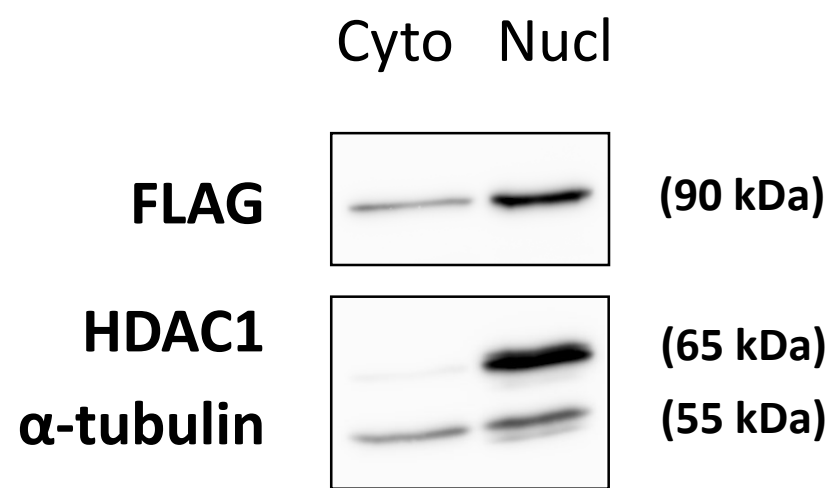

**D**

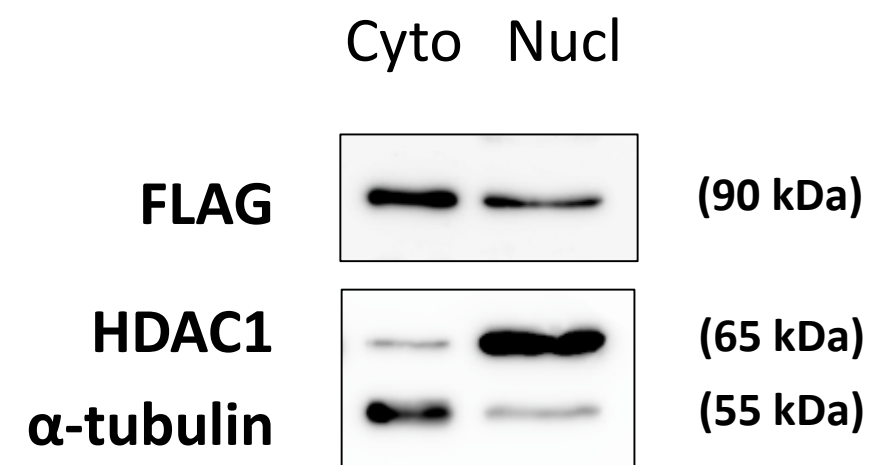

**B**

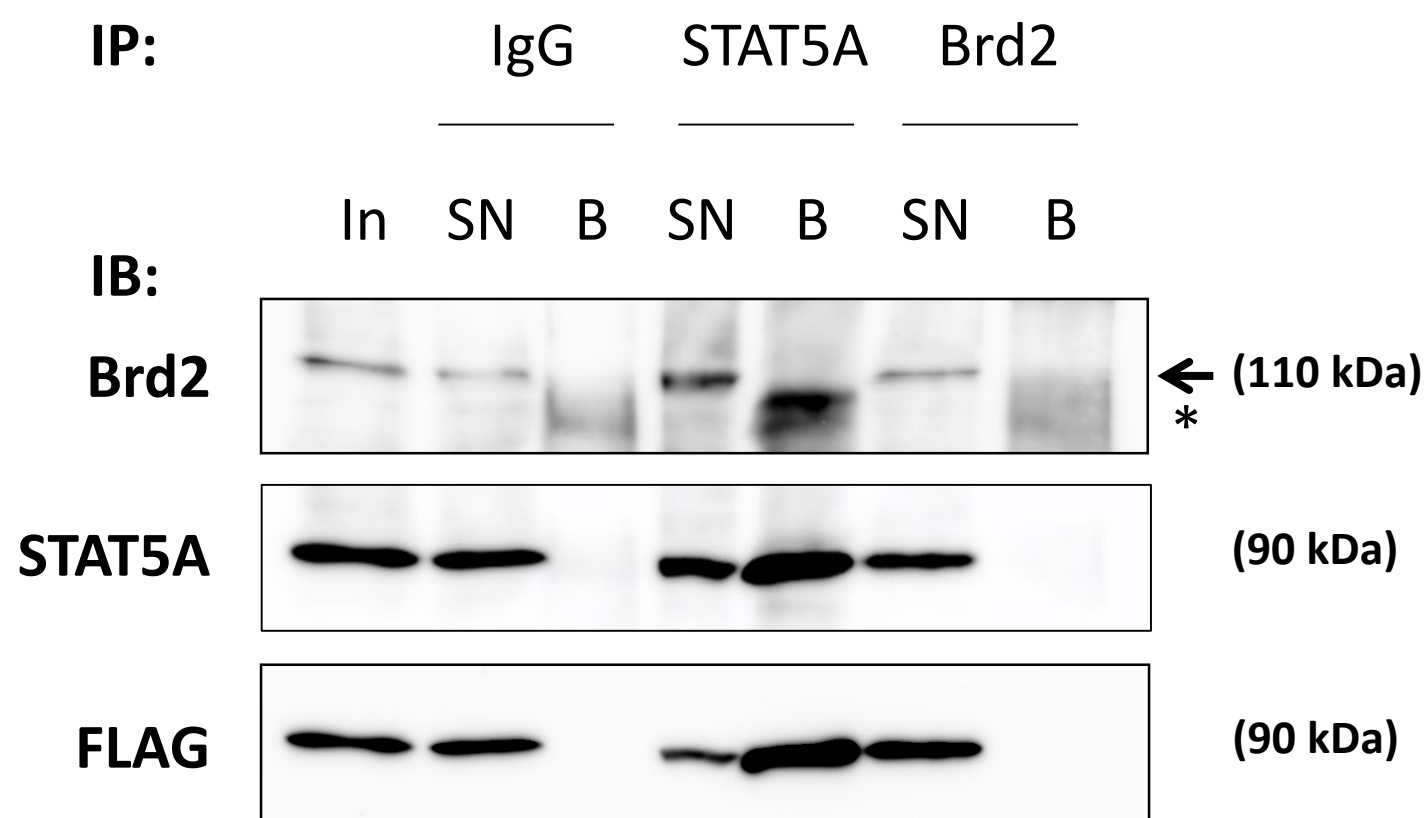

**E**

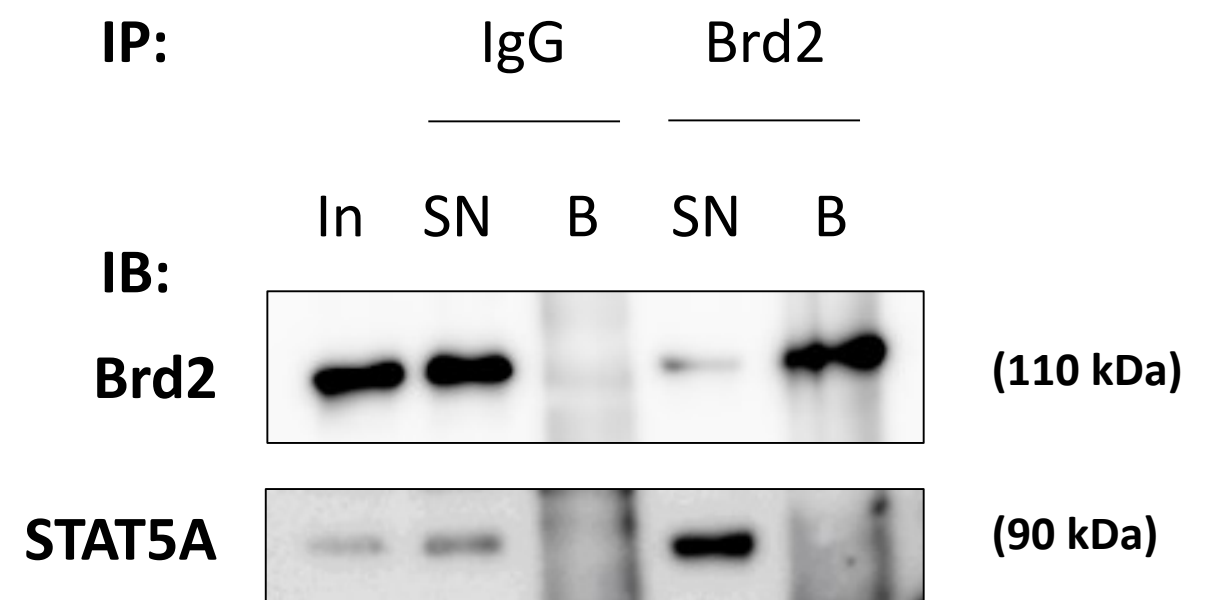

**C**

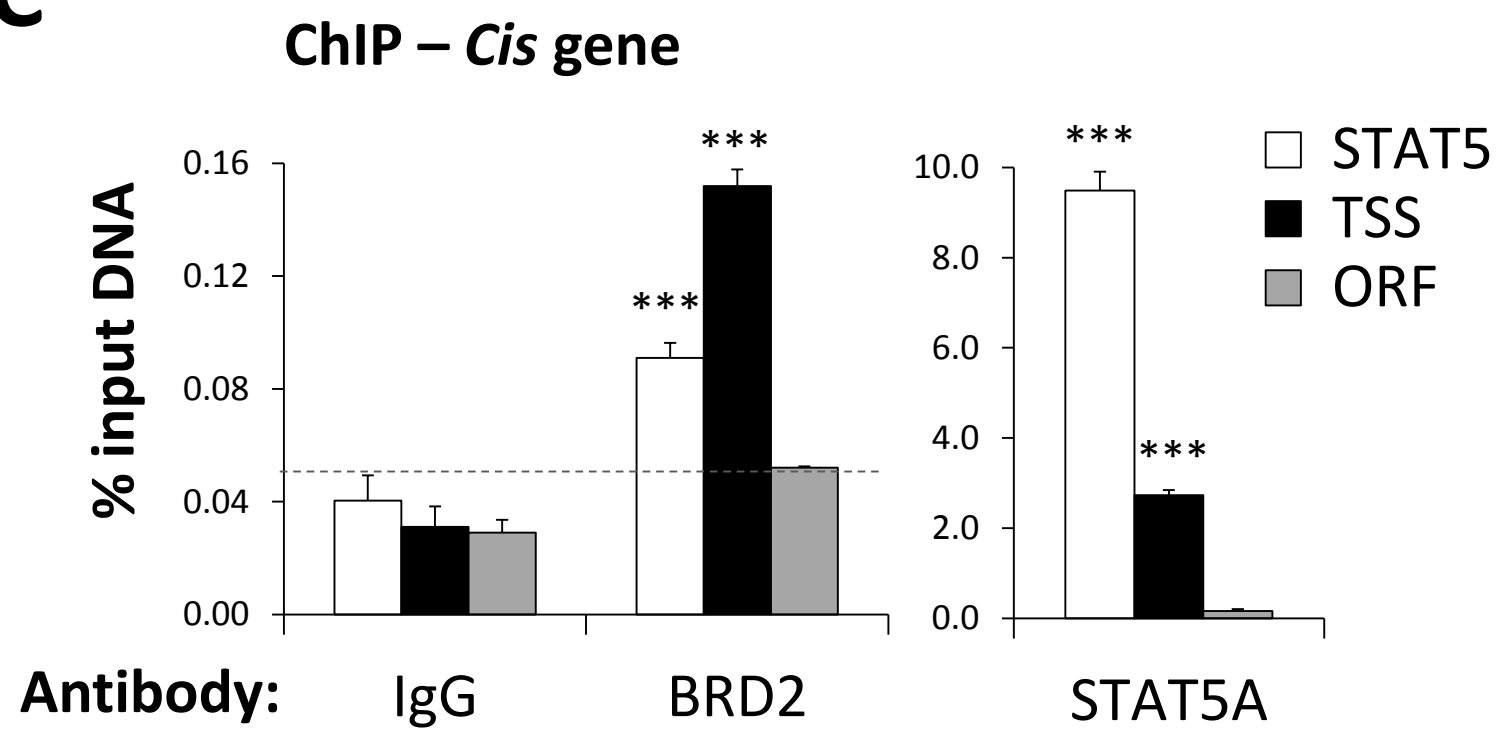

Figure S1 (Pinz et al.)
